# Supplementary material
Source: MDPI journal article supplement (https://www.mdpi.com/2673-3978/5/2/5)
Supplement: s1 [file s1 › electronicmat-2988328-supplementary.pdf]

---

## Supplementary Materials

We examined the drop cast CsPbI<sub>2</sub>Br sample on the TEM copper grid without any annealing process (**Figures S1a-c**). Also **Figure S1d** displays the selected area electron diffraction (SAED) pattern of CsPbI<sub>2</sub>Br displaying the phase impurity, which is different from the XRD pattern in Figures 7a and 8 (see Results and Discussion in *Article*). This indicates that without annealing, the sample has high phase-impurity, e.g., non-perovskite yellow phase (see **Table S1** containing estimated  $2\theta$  data for comparison purpose). Hence, the pseudo-cubic  $\alpha$ -phase CsPbI<sub>2</sub>Br with ‘iodine atoms’ might be kinetically stable (not thermodynamically) due to polymorphism [1,2]. Therefore, ‘iodine’ has double sides, increasing light absorption but causing stability problems under ambient conditions.

**Table S1.** Analysis of selected area electron diffraction (SAED) image for CsPbI<sub>2</sub>Br without annealing at room temperature.

| Perovskite            | Diameter (1/nm) | Radius (1/nm) | <i>d</i> -Spacing (nm) | $2\theta$ (°) |
|-----------------------|-----------------|---------------|------------------------|---------------|
| CsPbI <sub>2</sub> Br | 3.91            | 1.96          | 0.51                   | 17.3          |
|                       | 5.23            | 2.63          | 0.38                   | 23.2          |
|                       | 6.32            | 3.16          | 0.32                   | 28.2          |
|                       | 8.05            | 4.03          | 0.25                   | 36.1          |
|                       | 10.08           | 5.04          | 0.20                   | 45.7          |
|                       | 12.10           | 6.05          | 0.17                   | 55.5          |

---

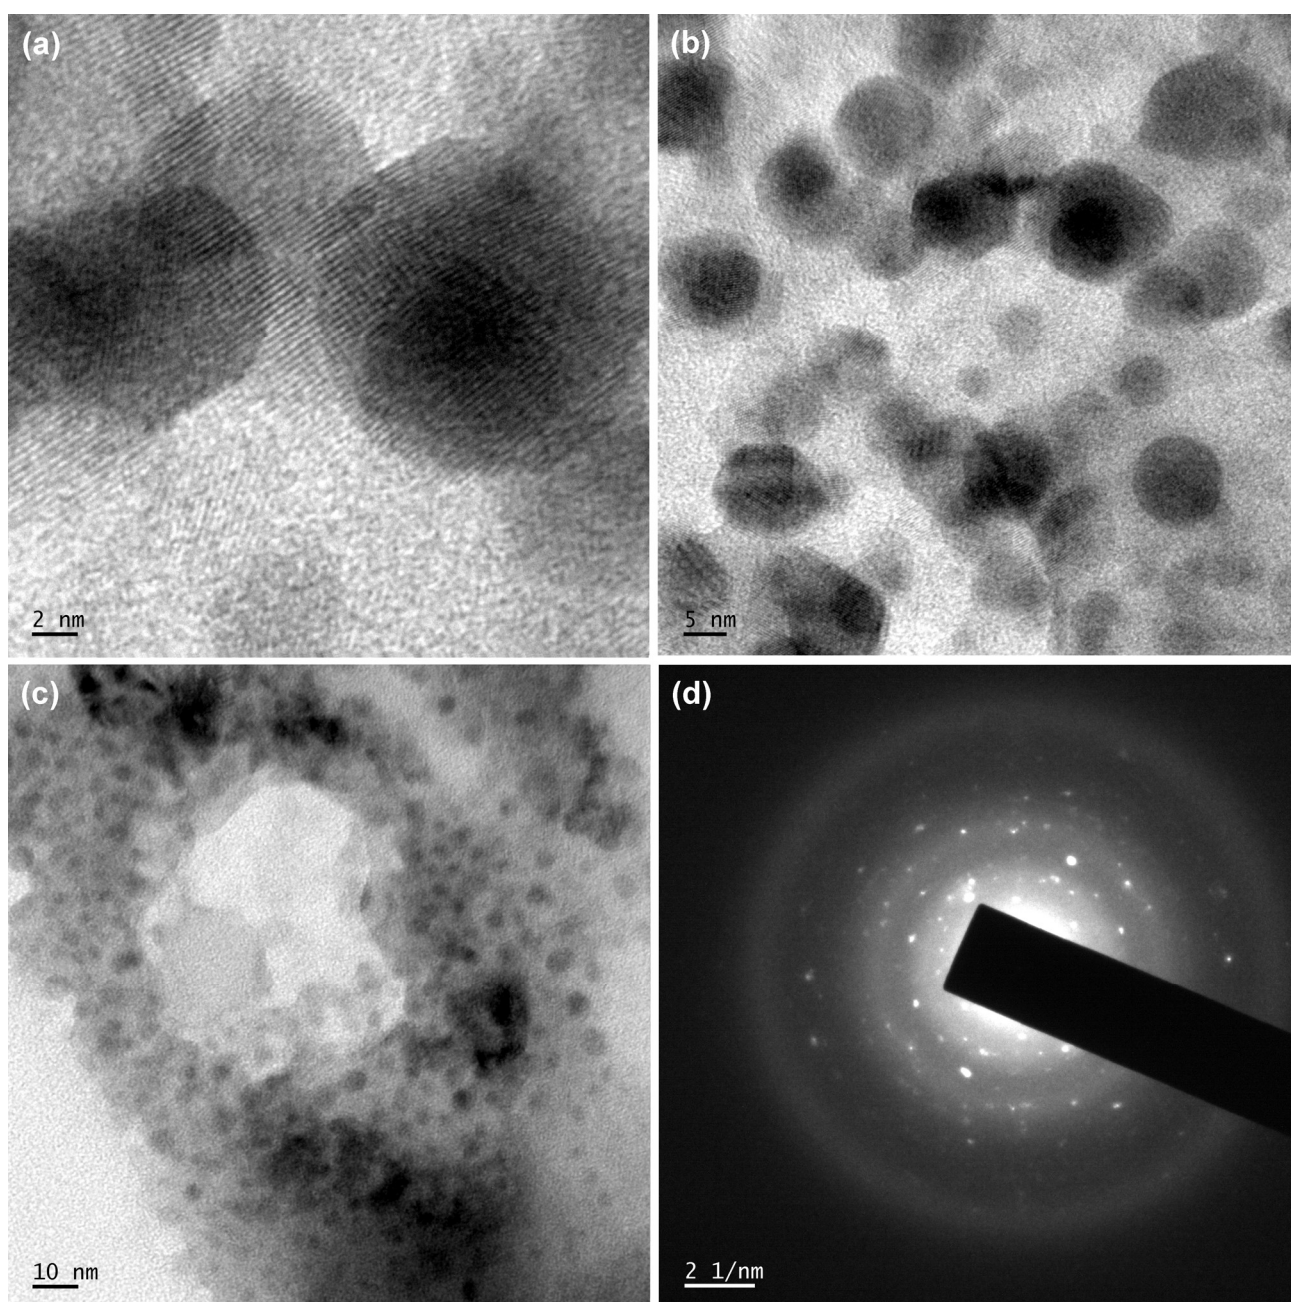

**Figure S1.** HR-TEM image of CsPbI<sub>2</sub>Br with different scale bar: (a) 2 nm, (b) 5 nm, and (c) 10 nm. (d) SAED pattern of CsPbI<sub>2</sub>Br displaying the phase impurity at room temperature.

## References

1. Alaei, A.; Circelli, A.; Yuan, Y.; Yang, Y.; Lee, S.S. Polymorphism in metal halide perovskites. *Mater. Adv.* **2021**, *2*, 47-63.
2. Wang, B.; Novendra, N.; Navrotsky, A. Energetics, Structures, and Phase Transitions of Cubic and Orthorhombic Cesium Lead Iodide (CsPbI<sub>3</sub>) Polymorphs. *J. Am. Chem. Soc.* **2019**, *141*, 14501–14504.
